# Supplementary material for: Facile synthesis of metal–organic cobalt hydroxide nanorods exhibiting a reversible structural transition
Source: Royal Society of Chemistry journal article supplement (doi:10.1039/c1cc14384k), 2011-01-01

Supporting Information for

## **Facile Synthesis of Metal-Organic Cobalt Hydroxide Nanorods Exhibiting a Reversible Structural Transition**

Lianying Wang,<sup>a</sup> Sen Lu,<sup>a</sup> Yuexi Zhou,<sup>b</sup> Xiaodi Guo,<sup>a</sup> Yanluo Lu,<sup>a</sup> Jing He,<sup>\*a</sup> and David G. Evans<sup>a</sup>

<sup>a</sup> State Key Laboratory of Chemical Resource Engineering, Beijing University of Chemical Technology, Beijing, 100029, P. R. China.

<sup>b</sup> Department of Water Pollution Control Technology, Chinese Research Academy of Environmental Sciences, Beijing, 100012, P. R. China.

## Supporting Information: Characterization.

Elemental analysis for cobalt was performed by inductively coupled plasma emission spectroscopy using a Shimadzu ICPS-7500 instrument on solutions prepared by dissolving samples in concentrated HNO<sub>3</sub>. Carbon, hydrogen, and oxygen analyses were carried out using an Elementar vario MICRO cube instrument.

Powder X-ray diffraction (PXRD) patterns of the samples were recorded using a Shimadzu XRD-6000 diffractometer under the following conditions: 40 kV, 30 mA, Cu K $\alpha_1$  radiation ( $\lambda = 0.15406$  nm). The samples were step-scanned in steps of 10 °/min in the  $2\theta$  range from 3 to 90°. The observed diffraction peaks were corrected using elemental Si as an internal standard. The samples were ground into powders before measurement.

Fourier transform infrared (FT-IR) spectra were recorded in the range 4000 to 400 cm<sup>-1</sup> with 2 cm<sup>-1</sup> resolution on a Bruker Vector-22 Fourier transform spectrometer using the KBr pellet technique (1 mg of sample in 100 mg of KBr).

Thermogravimetric analysis (TGA) was carried out using a Rigaku TG-8120 instrument in the temperature range 25–800 °C at a heating rate of 10 °C/min under a nitrogen flow.

Scanning electron microscope (SEM) images were obtained using a Hitachi S-4700 field emission SEM at 20 kV, with the surface of the samples coated with a thin platinum layer to avoid a charging effect.

Transmission electron microscopy (TEM) was performed on a Hitachi H-800 microscope with an accelerating voltage of 150 kV. The sample was ultrasonically dispersed in an appropriate amount of water and a drop of the resulting suspension was deposited on a carbon-coated Cu grid followed by evaporation of the solvent in air.

UV–visible diffuse reflectance spectra were recorded at room temperature in air on a Shimadzu UV-2450 spectrophotometer.

## Supporting Information: Figures.

**Fig. S1** EDX spectrum of  $\text{Co(OH)(Hsal)} \cdot \text{H}_2\text{O}$  nanorods prepared at  $70^\circ\text{C}$ .

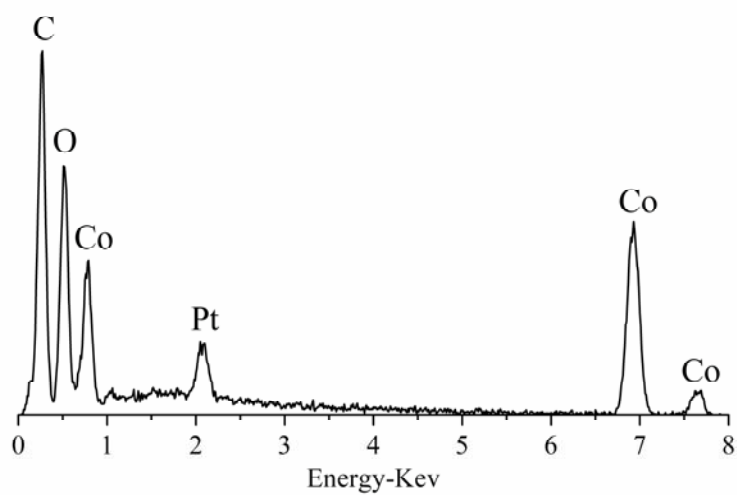

**Fig. S2** EDX spectrum of  $\text{Co(OH)(Hsal)} \cdot \text{H}_2\text{O}$  nanorods prepared at  $30^\circ\text{C}$ .

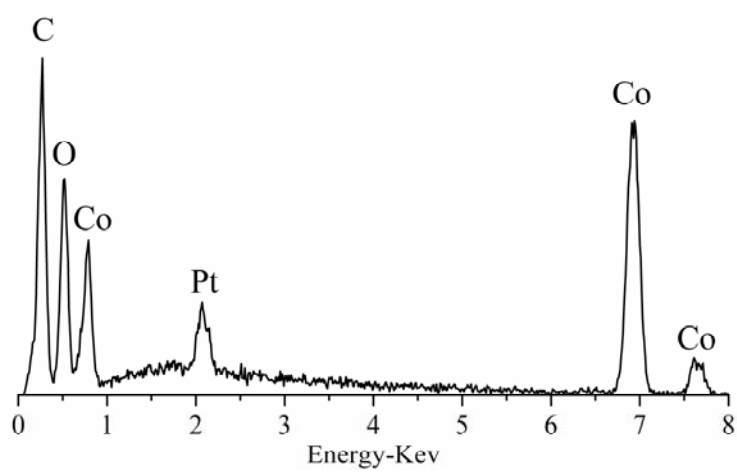

**Fig. S3** Powder XRD patterns of Co(OH)(Hsal)·H<sub>2</sub>O nanorods prepared at different temperatures: (a) 30 °C; (b) 70 °C; (c) 95 °C.

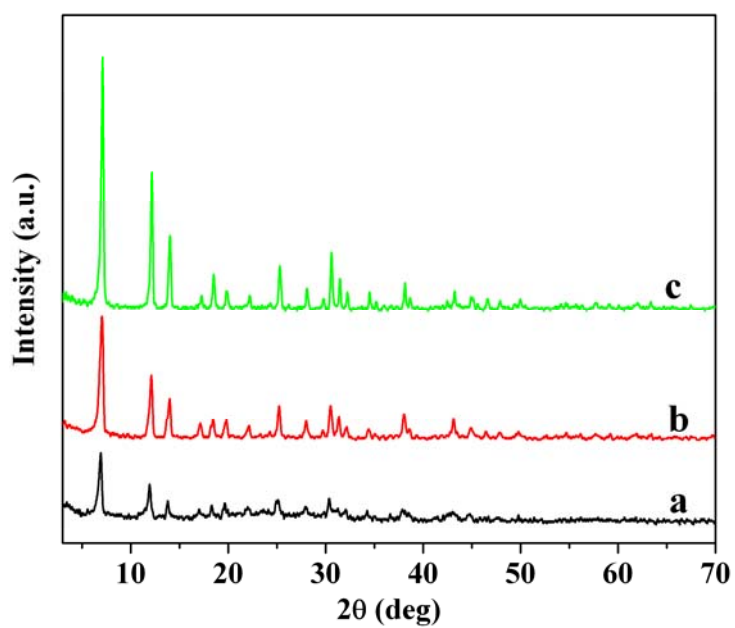

**Fig. S4** FT-IR spectra of (a) sodium salicylate and (b) Co(OH)(Hsal)·H<sub>2</sub>O nanorods.

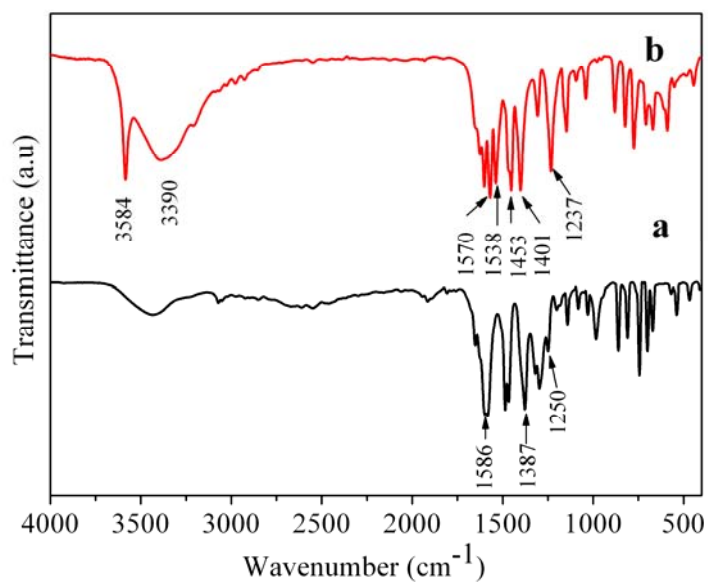

**Fig. S5** PXRD patterns of (a) cobalt/carbon nanocomposites obtained by heating  $\text{Co(OH)(Hsal)}\cdot\text{H}_2\text{O}$  nanorods in  $\text{N}_2$  at  $600\text{ }^\circ\text{C}$  and (b) of the material obtained by treating (a) with 63% nitric acid solution.

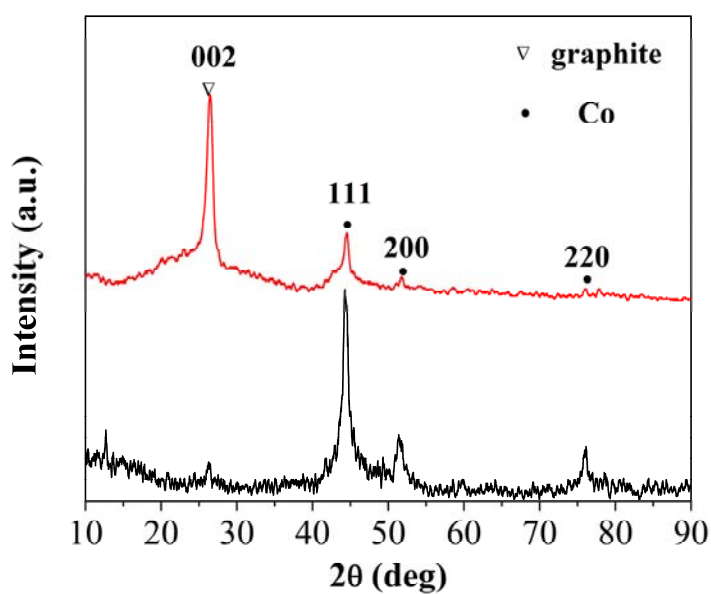

**Fig. S6** UV–visible diffuse reflectance spectra of the nanorods dehydrated at  $300\text{ }^\circ\text{C}$  followed by treatment with water.

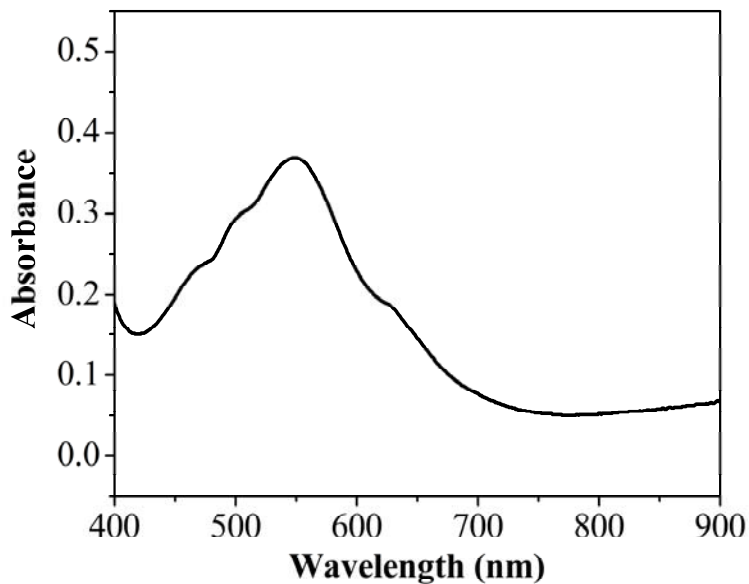

**Fig. S7** TGA curve of the nanorods dehydrated at 300 °C followed by treatment with water.

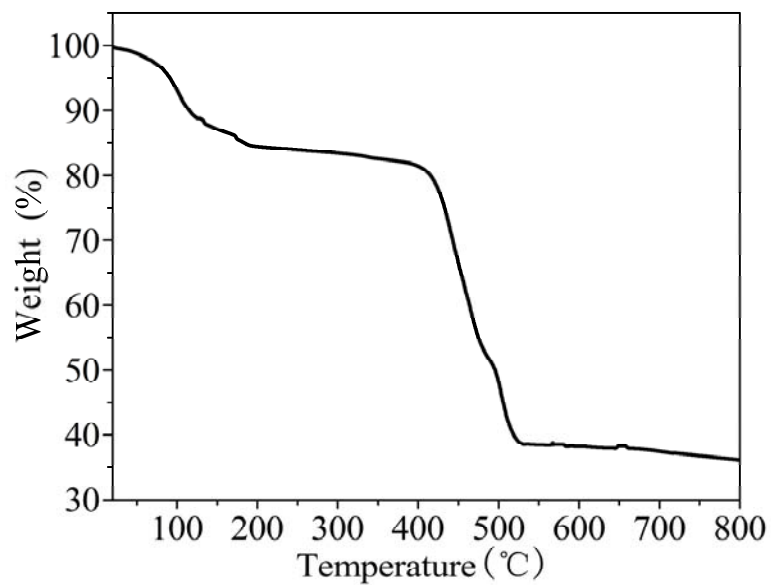

**Fig. S8** SEM images of the nanorods dehydrated at 300 °C followed by treatment with water.

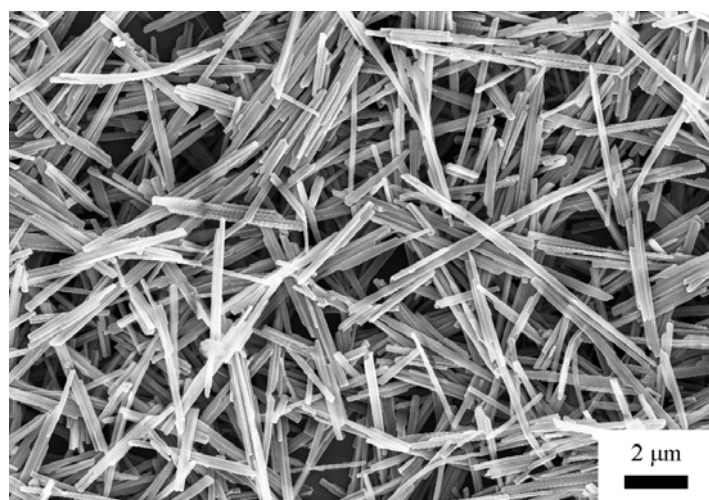

**Fig. S9** FT-IR spectra of (a) the original Co(OH)(Hsal)·H<sub>2</sub>O nanorods, (b) after heating at 300 °C, and (c) after treating the sample in (b) with water.

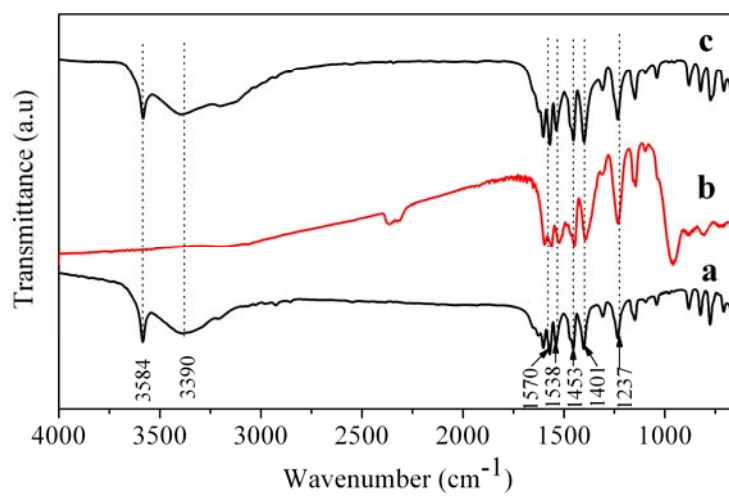

Supplement: c1cc14384k.pdf [file c1cc14384k.pdf]
